# Supplementary material for: Genomics and Proteomics of Mycobacteriophage Patience, an Accidental Tourist in the Mycobacterium Neighborhood
Source: PubMed Central journal article supplement — mBio. 2014 Dec 2;5(6):e02145-14. doi: 10.1128/mBio.02145-14 (PMC4324244; doi:10.1128/mbio.02145-14), 2014-12-02
Supplement: mbo006142076sf2.pdf [file mbo006142076sf2.pdf]

A

F E R F I D K N R S D M P D I D L D F D D E L R W K I P A H A R K  
 S S S D S S I R I V L I C Q T L I W T L M M N S A G K F R H T P G R  
 L R A I H R \* E S F \* Y A R H \* S G L \* \* \* T P L E N S G T R Q E  
 59501 TCTTCGAGCGATTATCGATAAGAATCGTTTCTGATATGCCAGACATTGATCTGGACTTTGATGATGAACCTCCGCTGGAAAATTCGCGCACACGCCAGGAA  
 .....|.....|.....|.....|.....|.....|.....|.....|.....|.....|.....|.....|.....|.....|.....|.....|  
 AGAAGCTCGCTAAGTAGCTATTCTTAGCAAGACTATACGGTCTGTAAGTCTAGACTGAAAACCTACTACTTGTAGGCGACCTTTTAAAGCCGTGTGCGGTCCTT

I Y G N E N V A N V A N H I T Y K G K N T L N D I A R A Y G F A Q  
 F M E M K T S P T S Q T T S P T K A K T R S T T L P G L T A S H R  
 D L W K \* K R R Q R R K P H H L Q R Q K H A Q R R H C Q G L R L R T E  
 59601 GATTTATGAAATGAAAACGTCGCCAACGTCGCAAACACATCACCTACAAAGGCAAACACGCTCAACGACATTGCCAGGCTTACCGCTTCGCACAG  
 .....|.....|.....|.....|.....|.....|.....|.....|.....|.....|.....|.....|.....|.....|.....|.....|  
 CTAATACTTTACTTTTGCAGCGGTTGCAGCGTGTGGTGTAGTGGATGTTCCGTTTTGTGCGAGTTGCTGTAACGGTCCCGAATGCCGAGCGTGTG

K T F D A I A K R C P D R V E T D T R L G N A I L D V V T A Y K H H  
 K L S T P L L K D V Q I G W K P T L D L E M Q F S M L S R R I S I  
 N F R R H C \* K M S R S G G N R H S T W K C N S R C C H G V \* A S  
 59701 AAAACTTTCGAGCCATTGCTAAAAGATGTCAGATCGGGTGGAAACCGACACTCGACTTGGAAATGCAATTCTCGATGTTGTACGGCGTATAAGCATC  
 .....|.....|.....|.....|.....|.....|.....|.....|.....|.....|.....|.....|.....|.....|.....|.....|  
 TTTTAAAGCTGCGGTAACGATTTTCTACAGGCTAGCCCACCTTGGCTGTGAGCTGAACCTTTACGTTAAGAGCTACAACAGTGGCGCATATTCTGTAG

P E I S K L L D T Y G D A I E E A I K L E G N Q H S M G I H A G G  
 I L K F R S C W I H T V M L L R K Q S N S R E T S I R W E F M L A G  
 S \* N F E A V G Y I R \* C Y \* G S N Q T R G K P A F D G N S C W R  
 59801 ATCCTGAAATTTGCAAGCTGTTGGATAACATACGGTGTGCTATTGAGGAAGCAATCAAACCTCGAGGGAAACCGACATTGCTATGCGGAAATTCATGTGCGG  
 .....|.....|.....|.....|.....|.....|.....|.....|.....|.....|.....|.....|.....|.....|.....|.....|  
 TAGGACTTTAAAGCTTCGACAACCTATGTATGCCACTACGATAACTCCTTCGTTAGTTTGTAGCTCCCTTTGCTGTAAGCTACCCCTTAAAGTACGACCGCC

F V I A S D P I P E V C P I Y T K Y K G Q G K K R E L A Q I I P Y  
 S L L L R T L F Q K C A R F I R N T R D K E R N A N \* P K S F R T  
 V R Y C F G P Y S R S V P D L Y E I Q G T R K E T R T S P N H S V R  
 59901 GTTCGTTATTGCTTCGGACCCATTTCAGAAAGTGTGCCCGATTTATACGAAATACAAGGACAAGGAAAGCAAGTACTAGCCAAATCATTCGCGTAC  
 .....|.....|.....|.....|.....|.....|.....|.....|.....|.....|.....|.....|.....|.....|.....|.....|  
 CAAGCAATAACGAAAGCCTGGGATAAGGTCTTACACGGGCTAATATGCTTTATGTTCCCTGTTCTTCTTGTGCGCTGATCGGGTTTAGTAAGGCATG

E K R D A E H L G M L K M D F L G L S T M G M I G K I R G W L R M E  
 K N E M Q N I S E C S R W T F S V C Q Q W A \* S G R F V V G F G C  
 K T R C R T S R N A Q D G L S R S V N N G H D R E D S W L A S D A  
 60001 GAAAAACGAGATGCAGAACATCTCGGAATGCTCAAGATGGACTTTCTCGGTCTGTCAACAATGGGCATGATCGGGAAGATTCGTTGGTGGCTTCGGATGC  
 .....|.....|.....|.....|.....|.....|.....|.....|.....|.....|.....|.....|.....|.....|.....|.....|  
 CTTTTGCTCTACGCTCTGTAGAGCCTTACGAGTTCTACCTGAAAGAGCCAGACAGTTGTTACCCGCTACTAGCCCTTCTAAGACCAACCGAAGCCTACG

B

G S \* V T S P T P H D R A D D Y M E L R K R W L N R Y A R V Q A Q  
 E A H K \* L V L P L M I A Q T I T W S L E N D G \* T D T H G F R L R  
 R L I S D \* S Y P S \* S R R R R L H G A \* K T M V E Q I R T G S G S  
 11501 GAGGCTCATAAGTACTAGTCTACCCCTCATGATCGCGCAGACGATTACATGGAGCTTAGAAAACGATGGTTGAACAGATACGCACGGGTTTCAGGCTCA  
 .....|.....|.....|.....|.....|.....|.....|.....|.....|.....|.....|.....|.....|.....|.....|.....|  
 CTCCGAGTATTCACTGATCAGGATGGGAGTACTAGCGGCTGCTAATGTACCTCGAATCTTTTGTACCAACTTGTCTATGCGTGCACCAAGTCCGAGT

A D K K L R D A L I Q A A E D A Y K Q L I S E T S K S T F S A H V  
 P T R N S G M L L F K Q R K M R T N N \* Y R R L Q K A R F R H M \*  
 G R Q E T P G C S Y S S G R C V Q T I D I G D F K K H V F G T C E  
 11601 GGCCGACAAGAACTCCGGGATGCTCTTATTCAAGCAGCGGAAAGATGCGTACAACAATTGATATCGGAGACTTCAAAAAGCACGTTTTTCGGCACATGTG  
 .....|.....|.....|.....|.....|.....|.....|.....|.....|.....|.....|.....|.....|.....|.....|.....|  
 CCGGCTGTTCTTTGAGGCCCTACGAGAATAAGTTCGTCGCCTTCTACGCATGTTTGTAACTATAGCCTCTGAAGTTTTTCGTGCAAAAGCCGTGTACAC

K S A Q I R I L L K E I R G I L D D L F G E E L K I I H L G Q S D A  
 K V P K S A S C \* R K L G V S L M T S S E K N S K L S I L D N Q T  
 K C P N P H P A K G N \* G Y P \* \* P L R R R T Q N Y P S W T I R R  
 11701 AAAAGTCCCAATCCGCATCTGCTAAAGGAATTAGGGGTATCCTTGATGACCTCTTCGGAGAAGAACTCAAATATCCATCTTGACAAATCAGACG  
 .....|.....|.....|.....|.....|.....|.....|.....|.....|.....|.....|.....|.....|.....|.....|.....|  
 TTTTACGGGTTTGGCGTAGGACGATTTCTTTAATCCCATAGGAACTACTGGAGAAGCCTTCTTGTAGTTTTAATAGTGTAGAACCTGTTAGTCTG

Figure S1
