# Supplementary material for: Genomics and Proteomics of Mycobacteriophage Patience, an Accidental Tourist in the Mycobacterium Neighborhood
Source: PubMed Central journal article supplement — mBio. 2014 Dec 2;5(6):e02145-14. doi: 10.1128/mBio.02145-14 (PMC4324244; doi:10.1128/mbio.02145-14), 2014-12-02
Supplement: mbo006142076sf3.pdf [file mbo006142076sf3.pdf]

|   | U          | C          | A          | G          |   |
|---|------------|------------|------------|------------|---|
| U | Phe 0.0520 | Ser 0.0599 | Tyr 0.1733 | Cys 0.2258 | U |
|   | Phe 1.0000 | Ser 0.5390 | Tyr 1.0000 | Cys 1.0000 | C |
|   | Leu 0.0055 | Ser 0.1311 | Och 1.0000 | Opa 1.0000 | A |
|   | Leu 0.1676 | Ser 1.0000 | Amb 1.0000 | Trp 1.0000 | G |
| C | Leu 0.0626 | Pro 0.0898 | His 0.2238 | Arg 0.2562 | U |
|   | Leu 0.5597 | Pro 0.6490 | His 1.0000 | Arg 1.0000 | C |
|   | Leu 0.0175 | Pro 0.0960 | Gln 0.1596 | Arg 0.1201 | A |
|   | Leu 1.0000 | Pro 1.0000 | Gln 1.0000 | Arg 0.5431 | G |
| A | Ile 0.0447 | Thr 0.0488 | Asn 0.1268 | Ser 0.1277 | U |
|   | Ile 1.0000 | Thr 1.0000 | Asn 1.0000 | Ser 0.6226 | C |
|   | Ile 0.0211 | Thr 0.1124 | Lys 0.2180 | Arg 0.0296 | A |
|   | Met 1.0000 | Thr 0.5372 | Lys 1.0000 | Arg 0.0832 | G |
| G | Val 0.0898 | Ala 0.0848 | Asp 0.2441 | Gly 0.3490 | U |
|   | Val 0.9267 | Ala 1.0000 | Asp 1.0000 | Gly 1.0000 | C |
|   | Val 0.0530 | Ala 0.1998 | Glu 0.4133 | Gly 0.1797 | A |
|   | Val 1.0000 | Ala 0.9203 | Glu 1.0000 | Gly 0.3111 | G |

M. smegmatis (67.4%)

|   | U          | C          | A          | G          |   |
|---|------------|------------|------------|------------|---|
| U | Phe 0.6285 | Ser 0.9079 | Tyr 0.6200 | Cys 0.8942 | U |
|   | Phe 1.0000 | Ser 0.4770 | Tyr 1.0000 | Cys 1.0000 | C |
|   | Leu 0.1221 | Ser 0.6151 | Och 1.0000 | Opa 1.0000 | A |
|   | Leu 0.8028 | Ser 1.0000 | Amb 1.0000 | Trp 1.0000 | G |
| C | Leu 1.0000 | Pro 0.6460 | His 0.9159 | Arg 1.0000 | U |
|   | Leu 0.7254 | Pro 0.5223 | His 1.0000 | Arg 0.8420 | C |
|   | Leu 0.1948 | Pro 0.4728 | Gln 1.0000 | Arg 0.6395 | A |
|   | Leu 0.9272 | Pro 1.0000 | Gln 0.8904 | Arg 0.3654 | G |
| A | Ile 1.0000 | Thr 0.9972 | Asn 0.9206 | Ser 0.5691 | U |
|   | Ile 0.9349 | Thr 1.0000 | Asn 1.0000 | Ser 0.6612 | C |
|   | Ile 0.1222 | Thr 0.7324 | Lys 0.7287 | Arg 0.3630 | A |
|   | Met 1.0000 | Thr 0.8817 | Lys 1.0000 | Arg 0.2420 | G |
| G | Val 1.0000 | Ala 1.0000 | Asp 1.0000 | Gly 1.0000 | U |
|   | Val 0.6346 | Ala 0.6880 | Asp 0.8256 | Gly 0.8314 | C |
|   | Val 0.2693 | Ala 0.8371 | Glu 1.0000 | Gly 0.7388 | A |
|   | Val 0.5780 | Ala 0.8544 | Glu 0.5876 | Gly 0.3702 | G |

Patience (50.3%)

|   | U          | C          | A          | G          |   |
|---|------------|------------|------------|------------|---|
| U | Phe 0.4737 | Ser 0.3875 | Tyr 0.2159 | Cys 0.5263 | U |
|   | Phe 1.0000 | Ser 0.3898 | Tyr 1.0000 | Cys 1.0000 | C |
|   | Leu 0.0630 | Ser 0.2668 | Och 1.0000 | Opa 1.0000 | A |
|   | Leu 0.4900 | Ser 0.3109 | Amb 1.0000 | Trp 1.0000 | G |
| C | Leu 0.4378 | Pro 0.8738 | His 0.2906 | Arg 0.9314 | U |
|   | Leu 0.3579 | Pro 0.7477 | His 1.0000 | Arg 1.0000 | C |
|   | Leu 0.3548 | Pro 0.9200 | Gln 0.4582 | Arg 0.4057 | A |
|   | Leu 1.0000 | Pro 1.0000 | Gln 1.0000 | Arg 0.7171 | G |
| A | Ile 0.6467 | Thr 0.6438 | Asn 0.3503 | Ser 0.4687 | U |
|   | Ile 1.0000 | Thr 1.0000 | Asn 1.0000 | Ser 1.0000 | C |
|   | Ile 0.1595 | Thr 0.7013 | Lys 0.2603 | Arg 0.2371 | A |
|   | Met 1.0000 | Thr 0.7058 | Lys 1.0000 | Arg 0.5829 | G |
| G | Val 0.5954 | Ala 0.6883 | Asp 0.4377 | Gly 0.6135 | U |
|   | Val 0.4878 | Ala 1.0000 | Asp 1.0000 | Gly 1.0000 | C |
|   | Val 0.4013 | Ala 0.7260 | Glu 0.5216 | Gly 0.2729 | A |
|   | Val 1.0000 | Ala 0.3941 | Glu 1.0000 | Gly 0.3297 | G |

Papyrus (56.0%)

|   | U          | C          | A          | G          |   |
|---|------------|------------|------------|------------|---|
| U | Phe 0.1573 | Ser 0.2695 | Tyr 0.3517 | Cys 0.2840 | U |
|   | Phe 1.0000 | Ser 0.3148 | Tyr 1.0000 | Cys 1.0000 | C |
|   | Leu 0.0046 | Ser 0.1955 | Och 1.0000 | Opa 1.0000 | A |
|   | Leu 0.2581 | Ser 0.5267 | Amb 1.0000 | Trp 1.0000 | G |
| C | Leu 0.2380 | Pro 0.3217 | His 0.4014 | Arg 0.5181 | U |
|   | Leu 0.8454 | Pro 0.6826 | His 1.0000 | Arg 1.0000 | C |
|   | Leu 0.0943 | Pro 0.3457 | Gln 0.2188 | Arg 0.3508 | A |
|   | Leu 1.0000 | Pro 1.0000 | Gln 1.0000 | Arg 0.5887 | G |
| A | Ile 0.2132 | Thr 0.2445 | Asn 0.4818 | Ser 0.1955 | U |
|   | Ile 1.0000 | Thr 1.0000 | Asn 1.0000 | Ser 1.0000 | C |
|   | Ile 0.0349 | Thr 0.3376 | Lys 0.1380 | Arg 0.0927 | A |
|   | Met 1.0000 | Thr 0.6533 | Lys 1.0000 | Arg 0.1915 | G |
| G | Val 0.3748 | Ala 0.5578 | Asp 0.4251 | Gly 0.4188 | U |
|   | Val 0.9388 | Ala 1.0000 | Asp 1.0000 | Gly 1.0000 | C |
|   | Val 0.1606 | Ala 0.4765 | Glu 0.3713 | Gly 0.3406 | A |
|   | Val 1.0000 | Ala 0.6933 | Glu 1.0000 | Gly 0.3069 | G |

PLot (59.7%)

|   | U          | C          | A          | G          |   |
|---|------------|------------|------------|------------|---|
| U | Phe 0.0313 | Ser 0.1748 | Tyr 0.0731 | Cys 0.1901 | U |
|   | Phe 1.0000 | Ser 0.5210 | Tyr 1.0000 | Cys 1.0000 | C |
|   | Leu 0.0014 | Ser 0.1618 | Och 1.0000 | Opa 1.0000 | A |
|   | Leu 0.1160 | Ser 1.0000 | Amb 1.0000 | Trp 1.0000 | G |
| C | Leu 0.0716 | Pro 0.1554 | His 0.1538 | Arg 0.3648 | U |
|   | Leu 0.6633 | Pro 0.6494 | His 1.0000 | Arg 1.0000 | C |
|   | Leu 0.0229 | Pro 0.1653 | Gln 0.1090 | Arg 0.3963 | A |
|   | Leu 1.0000 | Pro 1.0000 | Gln 1.0000 | Arg 0.8688 | G |
| A | Ile 0.0453 | Thr 0.0771 | Asn 0.0335 | Ser 0.0971 | U |
|   | Ile 1.0000 | Thr 1.0000 | Asn 1.0000 | Ser 0.6375 | C |
|   | Ile 0.0127 | Thr 0.1156 | Lys 0.0514 | Arg 0.0814 | A |
|   | Met 1.0000 | Thr 0.6450 | Lys 1.0000 | Arg 0.2520 | G |
| G | Val 0.0947 | Ala 0.3507 | Asp 0.1856 | Gly 0.3810 | U |
|   | Val 1.0000 | Ala 1.0000 | Asp 1.0000 | Gly 1.0000 | C |
|   | Val 0.0565 | Ala 0.3675 | Glu 0.2055 | Gly 0.2177 | A |
|   | Val 0.6427 | Ala 0.7381 | Glu 1.0000 | Gly 0.3170 | G |

Twister (65.0%)

|   | U          | C          | A          | G          |   |
|---|------------|------------|------------|------------|---|
| U | Phe 0.0257 | Ser 0.0512 | Tyr 0.0564 | Cys 0.1188 | U |
|   | Phe 1.0000 | Ser 0.4180 | Tyr 1.0000 | Cys 1.0000 | C |
|   | Leu 0.0033 | Ser 0.0861 | Och 1.0000 | Opa 1.0000 | A |
|   | Leu 0.0261 | Ser 0.6414 | Amb 1.0000 | Trp 1.0000 | G |
| C | Leu 0.0204 | Pro 0.1210 | His 0.0914 | Arg 0.1536 | U |
|   | Leu 0.4132 | Pro 0.7728 | His 1.0000 | Arg 1.0000 | C |
|   | Leu 0.0130 | Pro 0.0712 | Gln 0.0182 | Arg 0.1354 | A |
|   | Leu 1.0000 | Pro 1.0000 | Gln 1.0000 | Arg 0.6250 | G |
| A | Ile 0.0543 | Thr 0.0543 | Asn 0.0464 | Ser 0.0779 | U |
|   | Ile 1.0000 | Thr 1.0000 | Asn 1.0000 | Ser 1.0000 | C |
|   | Ile 0.0011 | Thr 0.0156 | Lys 0.0119 | Arg 0.0065 | A |
|   | Met 1.0000 | Thr 0.3993 | Lys 1.0000 | Arg 0.0781 | G |
| G | Val 0.0576 | Ala 0.1398 | Asp 0.1135 | Gly 0.2074 | U |
|   | Val 0.8508 | Ala 1.0000 | Asp 1.0000 | Gly 1.0000 | C |
|   | Val 0.0364 | Ala 0.0346 | Glu 0.0392 | Gly 0.0467 | A |
|   | Val 1.0000 | Ala 0.6228 | Glu 1.0000 | Gly 0.3163 | G |

KayaCho (70.0%)
