# Supplementary material for: Genomics and Proteomics of Mycobacteriophage Patience, an Accidental Tourist in the Mycobacterium Neighborhood
Source: PubMed Central journal article supplement — mBio. 2014 Dec 2;5(6):e02145-14. doi: 10.1128/mBio.02145-14 (PMC4324244; doi:10.1128/mbio.02145-14), 2014-12-02
Supplement: mbo006142076sf4.pdf [file mbo006142076sf4.pdf]

|   | U          | C          | A          | G          |   |
|---|------------|------------|------------|------------|---|
| U | Phe 0.0989 | Ser 0.1449 | Tyr 0.2955 | Cys 0.3685 | U |
|   | Phe 1.9011 | Ser 1.3039 | Tyr 1.7045 | Cys 1.6315 | C |
|   | Leu 0.0182 | Ser 0.3171 | Och 1.0000 | Opa 1.0000 | A |
|   | Leu 0.5546 | Ser 2.4191 | Amb 1.0000 | Trp 1.0000 | G |
| C | Leu 0.2070 | Pro 0.1957 | His 0.3657 | Arg 0.7563 | U |
|   | Leu 1.8526 | Pro 1.4149 | His 1.6343 | Arg 2.9524 | C |
|   | Leu 0.0579 | Pro 0.2092 | Gln 0.2753 | Arg 0.3546 | A |
|   | Leu 3.3097 | Pro 2.1801 | Gln 1.7247 | Arg 1.6036 | G |
| A | Ile 0.1258 | Thr 0.1149 | Asn 0.2251 | Ser 0.3090 | U |
|   | Ile 2.8149 | Thr 2.3552 | Asn 1.7749 | Ser 1.5061 | C |
|   | Ile 0.0593 | Thr 0.2647 | Lys 0.3580 | Arg 0.0875 | A |
|   | Met 1.0000 | Thr 1.2652 | Lys 1.6420 | Arg 0.2457 | G |
| G | Val 0.1736 | Ala 0.1538 | Asp 0.3925 | Gly 0.7587 | U |
|   | Val 1.7911 | Ala 1.8142 | Asp 1.6075 | Gly 2.1742 | C |
|   | Val 0.1025 | Ala 0.3625 | Glu 0.5849 | Gly 0.3908 | A |
|   | Val 1.9329 | Ala 1.6696 | Glu 1.4151 | Gly 0.6763 | G |

M. smegmatis (67.4%)

|   | U          | C          | A          | G          |   |
|---|------------|------------|------------|------------|---|
| U | Phe 0.7718 | Ser 1.2877 | Tyr 0.7654 | Cys 0.9442 | U |
|   | Phe 1.2282 | Ser 0.6765 | Tyr 1.2346 | Cys 1.0558 | C |
|   | Leu 0.1942 | Ser 0.8725 | Och 1.0000 | Opa 1.0000 | A |
|   | Leu 1.2769 | Ser 1.4184 | Amb 1.0000 | Trp 1.0000 | G |
| C | Leu 1.5905 | Pro 0.9784 | His 0.9561 | Arg 1.7382 | U |
|   | Leu 1.1537 | Pro 0.7910 | His 1.0439 | Arg 1.4635 | C |
|   | Leu 0.3099 | Pro 0.7160 | Gln 1.0580 | Arg 1.1116 | A |
|   | Leu 1.4748 | Pro 1.5145 | Gln 0.9420 | Arg 0.6352 | G |
| A | Ile 1.4583 | Thr 1.1045 | Asn 0.9587 | Ser 0.8072 | U |
|   | Ile 1.3634 | Thr 1.1076 | Asn 1.0413 | Ser 0.9378 | C |
|   | Ile 0.1782 | Thr 0.8112 | Lys 0.8430 | Arg 0.6309 | A |
|   | Met 1.0000 | Thr 0.9766 | Lys 1.1570 | Arg 0.4206 | G |
| G | Val 1.6116 | Ala 1.1836 | Asp 1.0955 | Gly 1.3603 | U |
|   | Val 1.0228 | Ala 0.8144 | Asp 0.9045 | Gly 1.1310 | C |
|   | Val 0.4340 | Ala 0.9908 | Glu 1.2597 | Gly 1.0051 | A |
|   | Val 0.9316 | Ala 1.0113 | Glu 0.7403 | Gly 0.5037 | G |

Patience (50.3%)

|   | U          | C          | A          | G          |   |
|---|------------|------------|------------|------------|---|
| U | Phe 0.6479 | Ser 0.8243 | Tyr 0.3495 | Cys 0.6931 | U |
|   | Phe 1.3521 | Ser 0.8343 | Tyr 1.6505 | Cys 1.3069 | C |
|   | Leu 0.1420 | Ser 0.5645 | Och 1.0000 | Opa 1.0000 | A |
|   | Leu 1.0878 | Ser 0.6545 | Amb 1.0000 | Trp 1.0000 | G |
| C | Leu 0.9700 | Pro 0.9689 | His 0.4484 | Arg 1.4348 | U |
|   | Leu 0.7933 | Pro 0.8447 | His 1.5516 | Arg 1.5472 | C |
|   | Leu 0.7794 | Pro 1.0506 | Gln 0.6200 | Arg 0.6252 | A |
|   | Leu 2.2275 | Pro 1.1358 | Gln 1.3800 | Arg 1.1199 | G |
| A | Ile 1.0817 | Thr 0.8446 | Asn 0.5185 | Ser 0.9792 | U |
|   | Ile 1.6529 | Thr 1.3109 | Asn 1.4815 | Ser 2.1432 | C |
|   | Ile 0.2654 | Thr 0.9150 | Lys 0.4099 | Arg 0.3643 | A |
|   | Met 1.0000 | Thr 0.9296 | Lys 1.5901 | Arg 0.9085 | G |
| G | Val 0.9503 | Ala 0.9878 | Asp 0.6082 | Gly 1.1138 | U |
|   | Val 0.7866 | Ala 1.4307 | Asp 1.3918 | Gly 1.8055 | C |
|   | Val 0.6497 | Ala 1.0250 | Glu 0.6808 | Gly 0.4950 | A |
|   | Val 1.6134 | Ala 0.5566 | Glu 1.3192 | Gly 0.5856 | G |

Papyrus (56.0)

|   | U          | C          | A          | G          |   |
|---|------------|------------|------------|------------|---|
| U | Phe 0.2719 | Ser 0.6464 | Tyr 0.5204 | Cys 0.4423 | U |
|   | Phe 1.7281 | Ser 0.7549 | Tyr 1.4796 | Cys 1.5577 | C |
|   | Leu 0.0114 | Ser 0.4688 | Och 1.0000 | Opa 1.0000 | A |
|   | Leu 0.6346 | Ser 1.2632 | Amb 1.0000 | Trp 1.0000 | G |
| C | Leu 0.5852 | Pro 0.5476 | His 0.5729 | Arg 1.1338 | U |
|   | Leu 2.0785 | Pro 1.1619 | His 1.4271 | Arg 2.1882 | C |
|   | Leu 0.2318 | Pro 0.5883 | Gln 0.3590 | Arg 0.7676 | A |
|   | Leu 2.4585 | Pro 1.7021 | Gln 1.6410 | Arg 1.2882 | G |
| A | Ile 0.5125 | Thr 0.4376 | Asn 0.6502 | Ser 0.4688 | U |
|   | Ile 2.4036 | Thr 1.7894 | Asn 1.3498 | Ser 2.3980 | C |
|   | Ile 0.0839 | Thr 0.6041 | Lys 0.2426 | Arg 0.2029 | A |
|   | Met 1.0000 | Thr 1.1690 | Lys 1.7574 | Arg 0.4191 | G |
| G | Val 0.6059 | Ala 0.8180 | Asp 0.5966 | Gly 0.8107 | U |
|   | Val 1.5178 | Ala 1.4665 | Asp 1.4034 | Gly 1.9359 | C |
|   | Val 0.2597 | Ala 0.6987 | Glu 0.5415 | Gly 0.6593 | A |
|   | Val 1.6167 | Ala 1.0167 | Glu 1.4585 | Gly 0.5941 | G |

Plot (59.7%)

|   | U          | C          | A          | G          |   |
|---|------------|------------|------------|------------|---|
| U | Phe 0.0616 | Ser 0.3918 | Tyr 0.1256 | Cys 0.3194 | U |
|   | Phe 1.9384 | Ser 1.2138 | Tyr 1.8744 | Cys 1.6806 | C |
|   | Leu 0.0047 | Ser 0.3688 | Och 1.0000 | Opa 1.0000 | A |
|   | Leu 0.3806 | Ser 2.3124 | Amb 1.0000 | Trp 1.0000 | G |
| C | Leu 0.2349 | Pro 0.3169 | His 0.2699 | Arg 0.7284 | U |
|   | Leu 2.1002 | Pro 1.3292 | His 1.7301 | Arg 2.0342 | C |
|   | Leu 0.0752 | Pro 0.3292 | Gln 0.1968 | Arg 0.8040 | A |
|   | Leu 3.2044 | Pro 2.0247 | Gln 1.8032 | Arg 1.7644 | G |
| A | Ile 0.1257 | Thr 0.1708 | Asn 0.0658 | Ser 0.2305 | U |
|   | Ile 2.8378 | Thr 2.1753 | Asn 1.9342 | Ser 1.4827 | C |
|   | Ile 0.0365 | Thr 0.2517 | Lys 0.0949 | Arg 0.1673 | A |
|   | Met 1.0000 | Thr 1.4022 | Lys 1.9051 | Arg 0.5018 | G |
| G | Val 0.2114 | Ala 0.5740 | Asp 0.3140 | Gly 0.8017 | U |
|   | Val 2.2392 | Ala 1.6233 | Asp 1.6860 | Gly 2.0908 | C |
|   | Val 0.1248 | Ala 0.5992 | Glu 0.3420 | Gly 0.4470 | A |
|   | Val 1.4246 | Ala 1.2035 | Glu 1.6580 | Gly 0.6604 | G |

Twister (65.0%)

|   | U          | C          | A          | G          |   |
|---|------------|------------|------------|------------|---|
| U | Phe 0.0502 | Ser 0.1351 | Tyr 0.1068 | Cys 0.2124 | U |
|   | Phe 1.9498 | Ser 1.1027 | Tyr 1.8932 | Cys 1.7876 | C |
|   | Leu 0.0133 | Ser 0.2270 | Och 1.0000 | Opa 1.0000 | A |
|   | Leu 0.1060 | Ser 1.6919 | Amb 1.0000 | Trp 1.0000 | G |
| C | Leu 0.0828 | Pro 0.2462 | His 0.1675 | Arg 0.4612 | U |
|   | Leu 1.6797 | Pro 1.5732 | His 1.8325 | Arg 3.0020 | C |
|   | Leu 0.0530 | Pro 0.1450 | Gln 0.0358 | Arg 0.4065 | A |
|   | Leu 4.0652 | Pro 2.0356 | Gln 1.9642 | Arg 1.8762 | G |
| A | Ile 0.1542 | Thr 0.1478 | Asn 0.0887 | Ser 0.2054 | U |
|   | Ile 2.8426 | Thr 2.7226 | Asn 1.9113 | Ser 2.6378 | C |
|   | Ile 0.0031 | Thr 0.0426 | Lys 0.0235 | Arg 0.0195 | A |
|   | Met 1.0000 | Thr 1.0870 | Lys 1.9765 | Arg 0.2345 | G |
| G | Val 0.1184 | Ala 0.3111 | Asp 0.2039 | Gly 0.5283 | U |
|   | Val 1.7498 | Ala 2.2256 | Asp 1.7961 | Gly 2.5472 | C |
|   | Val 0.0749 | Ala 0.0771 | Glu 0.0755 | Gly 0.1189 | A |
|   | Val 2.0568 | Ala 1.3861 | Glu 1.9245 | Gly 0.8057 | G |

KayaCho (70.0%)

Figure S4
