# Supplementary material for: Genomics and Proteomics of Mycobacteriophage Patience, an Accidental Tourist in the Mycobacterium Neighborhood
Source: PubMed Central journal article supplement — mBio. 2014 Dec 2;5(6):e02145-14. doi: 10.1128/mBio.02145-14 (PMC4324244; doi:10.1128/mbio.02145-14), 2014-12-02
Supplement: mbo006142076sf6.pdf [file mbo006142076sf6.pdf]

|          | U          | C          | A          | G          |          |
|----------|------------|------------|------------|------------|----------|
| <b>U</b> | Phe 0.8314 | Ser 0.7698 | Tyr 0.6928 | Cys 0.6435 | <b>U</b> |
|          | Phe 1.0000 | Ser 1.0000 | Tyr 1.0000 | Cys 1.0000 | <b>C</b> |
|          | Leu 0.2864 | Ser 0.4859 | Och 1.0000 | Opa 1.0000 | <b>A</b> |
|          | Leu 0.9321 | Ser 0.8272 | Amb 1.0000 | Trp 1.0000 | <b>G</b> |
| <b>C</b> | Leu 0.8049 | Pro 0.7542 | His 0.6632 | Arg 0.7619 | <b>U</b> |
|          | Leu 1.0000 | Pro 0.7169 | His 1.0000 | Arg 1.0000 | <b>C</b> |
|          | Leu 0.4142 | Pro 1.0000 | Gln 0.8583 | Arg 0.3363 | <b>A</b> |
|          | Leu 0.9057 | Pro 0.7618 | Gln 1.0000 | Arg 0.2577 | <b>G</b> |
| <b>A</b> | Ile 0.7155 | Thr 0.4800 | Asn 0.5948 | Ser 0.3551 | <b>U</b> |
|          | Ile 1.0000 | Thr 1.0000 | Asn 1.0000 | Ser 0.6937 | <b>C</b> |
|          | Ile 0.1038 | Thr 0.3658 | Lys 0.7926 | Arg 0.0822 | <b>A</b> |
|          | Met 1.0000 | Thr 0.4671 | Lys 1.0000 | Arg 0.0972 | <b>G</b> |
| <b>G</b> | Val 0.7652 | Ala 0.9275 | Asp 1.0000 | Gly 0.7691 | <b>U</b> |
|          | Val 0.7060 | Ala 0.9993 | Asp 0.9660 | Gly 1.0000 | <b>C</b> |
|          | Val 0.4621 | Ala 1.0000 | Glu 1.0000 | Gly 0.4527 | <b>A</b> |
|          | Val 1.0000 | Ala 0.8001 | Glu 0.8788 | Gly 0.2992 | <b>G</b> |

  

|          | U          | C          | A          | G          |          |
|----------|------------|------------|------------|------------|----------|
| <b>U</b> | Phe 1.0000 | Ser 1.0000 | Tyr 1.0000 | Cys 0.6305 | <b>U</b> |
|          | Phe 0.7031 | Ser 0.9659 | Tyr 0.8172 | Cys 1.0000 | <b>C</b> |
|          | Leu 0.3803 | Ser 0.4939 | Och 1.0000 | Opa 1.0000 | <b>A</b> |
|          | Leu 0.6987 | Ser 0.5639 | Amb 1.0000 | Trp 1.0000 | <b>G</b> |
| <b>C</b> | Leu 1.0000 | Pro 1.0000 | His 1.0000 | Arg 0.8414 | <b>U</b> |
|          | Leu 0.8896 | Pro 0.9036 | His 0.9901 | Arg 1.0000 | <b>C</b> |
|          | Leu 0.4317 | Pro 0.7852 | Gln 0.7780 | Arg 0.4093 | <b>A</b> |
|          | Leu 0.8396 | Pro 0.9153 | Gln 1.0000 | Arg 0.4238 | <b>G</b> |
| <b>A</b> | Ile 0.8106 | Thr 0.7403 | Asn 0.8303 | Ser 0.3039 | <b>U</b> |
|          | Ile 1.0000 | Thr 1.0000 | Asn 1.0000 | Ser 0.6591 | <b>C</b> |
|          | Ile 0.2522 | Thr 0.5465 | Lys 0.9458 | Arg 0.2018 | <b>A</b> |
|          | Met 1.0000 | Thr 0.6030 | Lys 1.0000 | Arg 0.1950 | <b>G</b> |
| <b>G</b> | Val 0.9052 | Ala 1.0000 | Asp 1.0000 | Gly 0.7004 | <b>U</b> |
|          | Val 0.6838 | Ala 0.8852 | Asp 0.7841 | Gly 1.0000 | <b>C</b> |
|          | Val 0.5982 | Ala 0.9235 | Glu 0.9547 | Gly 0.6947 | <b>A</b> |
|          | Val 1.0000 | Ala 0.7703 | Glu 1.0000 | Gly 0.5068 | <b>G</b> |

  

|          | U          | C          | A          | G          |          |
|----------|------------|------------|------------|------------|----------|
| <b>U</b> | Phe 1.0000 | Ser 0.9118 | Tyr 0.9560 | Cys 0.6030 | <b>U</b> |
|          | Phe 0.9006 | Ser 1.0000 | Tyr 1.0000 | Cys 1.0000 | <b>C</b> |
|          | Leu 0.2990 | Ser 0.4693 | Och 1.0000 | Opa 1.0000 | <b>A</b> |
|          | Leu 0.6906 | Ser 0.6504 | Amb 1.0000 | Trp 1.0000 | <b>G</b> |
| <b>C</b> | Leu 0.9414 | Pro 0.9977 | His 0.8321 | Arg 0.7605 | <b>U</b> |
|          | Leu 1.0000 | Pro 0.9605 | His 1.0000 | Arg 1.0000 | <b>C</b> |
|          | Leu 0.3915 | Pro 0.8323 | Gln 0.6994 | Arg 0.3822 | <b>A</b> |
|          | Leu 0.9294 | Pro 1.0000 | Gln 1.0000 | Arg 0.3908 | <b>G</b> |
| <b>A</b> | Ile 0.6776 | Thr 0.6059 | Asn 0.6575 | Ser 0.2962 | <b>U</b> |
|          | Ile 1.0000 | Thr 1.0000 | Asn 1.0000 | Ser 0.6826 | <b>C</b> |
|          | Ile 0.1910 | Thr 0.4937 | Lys 0.8639 | Arg 0.1600 | <b>A</b> |
|          | Met 1.0000 | Thr 0.6161 | Lys 1.0000 | Arg 0.1698 | <b>G</b> |
| <b>G</b> | Val 0.7664 | Ala 1.0000 | Asp 1.0000 | Gly 0.6936 | <b>U</b> |
|          | Val 0.7415 | Ala 0.9191 | Asp 0.9271 | Gly 1.0000 | <b>C</b> |
|          | Val 0.4625 | Ala 0.9500 | Glu 0.9644 | Gly 0.6437 | <b>A</b> |
|          | Val 1.0000 | Ala 0.8282 | Glu 1.0000 | Gly 0.4584 | <b>G</b> |

*Corynebacterium diptheriae* (53.7%)

*Corynebacterium pseudotuberculosis* (52.2%)

*Corynebacterium ulcerans* (53.4%)

Figure S6
