# Supplementary material for: Genomics and Proteomics of Mycobacteriophage Patience, an Accidental Tourist in the Mycobacterium Neighborhood
Source: PubMed Central journal article supplement — mBio. 2014 Dec 2;5(6):e02145-14. doi: 10.1128/mBio.02145-14 (PMC4324244; doi:10.1128/mbio.02145-14), 2014-12-02
Supplement: mbo006142076st1.pdf [file mbo006142076st1.pdf]

**Table S1. Patience peptides identified by mass spectrometry**

| Coding frame      | Product/Function   | Particles |           | Infection: 30 mins |           | Infection: 2.5. hrs |           | Total Peptides <sup>1</sup> |           |
|-------------------|--------------------|-----------|-----------|--------------------|-----------|---------------------|-----------|-----------------------------|-----------|
|                   |                    | Relaxed   | Stringent | Relaxed            | Stringent | Relaxed             | Stringent | Relaxed                     | Stringent |
| CDS 14051 - 15262 | gp23 Capsid        | 605       | 572       | 203                | 195       | 346                 | 338       | 1154                        | 1105      |
| CDS 9031 - 9918   | gp15               | 785       | 694       | 135                | 129       | 117                 | 115       | 1037                        | 938       |
| CDS 52672 - 53226 | gp79               | 201       | 181       | 145                | 132       | 682                 | 624       | 1028                        | 937       |
| CDS 2039 - 2350   | gp04               | 587       | 519       | 37                 | 36        | 68                  | 63        | 692                         | 618       |
| CDS 20117 - 26764 | gp34 Tapemeasure   | 570       | 502       | 14                 | 9         | 90                  | 85        | 674                         | 596       |
| CDS 13312 - 14010 | gp22               | 268       | 213       | 68                 | 64        | 238                 | 201       | 574                         | 478       |
| CDS 17712 - 18134 | gp29               | 346       | 289       | 11                 | 10        | 183                 | 166       | 540                         | 465       |
| CDS 8486 - 9031   | gp14               | 294       | 257       | 72                 | 67        | 54                  | 52        | 420                         | 376       |
| CDS 56615 - 57301 | gp86               | 13        | 12        | 68                 | 65        | 300                 | 298       | 381                         | 375       |
| CDS 10470 - 11075 | gp18               | 265       | 233       | 66                 | 60        | 45                  | 42        | 376                         | 335       |
| CDS 55493 - 56551 | gp85 RecA          | 1         | 0         | 88                 | 84        | 227                 | 222       | 316                         | 306       |
| CDS 5239 - 6870   | gp08 Portal        | 191       | 182       | 48                 | 43        | 76                  | 72        | 315                         | 297       |
| CDS 12413 - 13234 | gp21               | 5         | 3         | 2                  | 2         | 218                 | 214       | 225                         | 219       |
| CDS 15371 - 16057 | gp24 Head-tail     | 66        | 62        | 7                  | 7         | 160                 | 149       | 233                         | 218       |
| CDS 18355 - 19203 | gp31 Major tail    | 119       | 97        | 51                 | 48        | 66                  | 64        | 236                         | 209       |
| CDS 29291 - 32593 | gp37 Minor tail    | 226       | 195       | 0                  | 0         | 10                  | 9         | 236                         | 204       |
| CDS 7944 - 8486   | gp13               | 182       | 153       | 26                 | 25        | 18                  | 17        | 226                         | 195       |
| CDS 19282 - 19842 | gp32 Tail assembly | 0         | 0         | 8                  | 6         | 195                 | 186       | 203                         | 192       |
| CDS 44006 - 45382 | gp61               | 0         | 0         | 118                | 109       | 74                  | 70        | 192                         | 179       |
| CDS 10117 - 10470 | gp17               | 143       | 124       | 20                 | 20        | 24                  | 23        | 187                         | 167       |
| CDS 27651 - 29294 | gp36 Minor tail    | 122       | 114       | 13                 | 9         | 38                  | 35        | 173                         | 158       |
| CDS 26761 - 27651 | gp35 Minor tail    | 127       | 116       | 25                 | 23        | 21                  | 17        | 173                         | 156       |
| CDS 16060 - 16389 | gp25 Head-tail     | 95        | 92        | 24                 | 23        | 26                  | 26        | 145                         | 141       |
| CDS 42070 - 42534 | gp56               | 0         | 0         | 63                 | 57        | 70                  | 67        | 133                         | 124       |
| CDS 16390 - 16761 | gp26 Head-tail     | 98        | 81        | 18                 | 17        | 22                  | 21        | 138                         | 119       |
| CDS 53552 - 54784 | gp81 Helicase      | 0         | 0         | 26                 | 19        | 93                  | 86        | 119                         | 105       |
| CDS 33643 - 34008 | gp39 Minor tail    | 54        | 48        | 6                  | 6         | 33                  | 33        | 93                          | 87        |
| CDS 11512 - 12426 | gp20 MuF-like      | 83        | 57        | 6                  | 3         | 22                  | 21        | 111                         | 81        |
| CDS 49716 - 51749 | gp76 Helicase      | 0         | 0         | 18                 | 7         | 73                  | 71        | 91                          | 78        |
| CDS 17304 - 17705 | gp28 Head-tail     | 54        | 49        | 6                  | 6         | 22                  | 22        | 82                          | 77        |
| CDS 66049 - 66372 | gp105 Primase      | 0         | 0         | 7                  | 7         | 68                  | 64        | 75                          | 71        |
| CDS 650 - 2029    | gp03               | 0         | 0         | 2                  | 2         | 67                  | 63        | 69                          | 65        |
| CDS 64577 - 64987 | gp101              | 0         | 0         | 16                 | 14        | 52                  | 51        | 68                          | 65        |
| CDS 1 - 351       | gp01               | 31        | 27        | 6                  | 6         | 27                  | 26        | 64                          | 59        |
| CDS 7300 - 7722   | gp11               | 36        | 30        | 20                 | 17        | 7                   | 6         | 63                          | 53        |
| CDS 7723 - 7944   | gp12               | 36        | 33        | 6                  | 5         | 4                   | 3         | 46                          | 41        |
| CDS 6881 - 6994   | gp111              | 36        | 33        | 3                  | 3         | 5                   | 5         | 44                          | 41        |
| CDS 64987 - 65295 | gp102              | 0         | 0         | 0                  | 0         | 43                  | 41        | 43                          | 41        |
| CDS 47011 - 47343 | gp70               | 0         | 0         | 6                  | 6         | 34                  | 33        | 40                          | 39        |
| CDS 63328 - 63657 | gp96               | 0         | 0         | 8                  | 7         | 30                  | 29        | 38                          | 36        |
| CDS 43583 - 43951 | gp60               | 0         | 0         | 12                 | 8         | 28                  | 27        | 40                          | 35        |
| CDS 55114 - 55449 | gp84               | 0         | 0         | 9                  | 8         | 29                  | 27        | 38                          | 35        |
| CDS 67316 - 70024 | gp109 Prim/Pol     | 0         | 0         | 7                  | 1         | 31                  | 29        | 38                          | 30        |

|                   |                    |    |    |    |   |    |    |    |    |
|-------------------|--------------------|----|----|----|---|----|----|----|----|
| CDS 32593 - 33633 | gp38 Minor tail    | 27 | 22 | 0  | 0 | 6  | 6  | 33 | 28 |
| CDS 61443 - 61976 | gp92               | 0  | 0  | 1  | 1 | 28 | 27 | 29 | 28 |
| CDS 2590 - 3042   | gp05 HNH           | 1  | 0  | 4  | 2 | 25 | 24 | 30 | 26 |
| CDS 41450 - 41854 | gp54               | 0  | 0  | 1  | 0 | 27 | 26 | 28 | 26 |
| CDS 41857 - 42051 | gp55               | 0  | 0  | 10 | 9 | 17 | 17 | 27 | 26 |
| CDS 46744 - 46995 | gp69               | 0  | 0  | 4  | 3 | 21 | 20 | 25 | 23 |
| CDS 34399 - 35790 | gp41 Lysin A       | 0  | 0  | 0  | 0 | 22 | 22 | 22 | 22 |
| CDS 48588 - 49178 | gp74               | 0  | 0  | 4  | 4 | 17 | 17 | 21 | 21 |
| CDS 59546 - 59983 | unknown            | 0  | 0  | 0  | 0 | 19 | 17 | 19 | 17 |
| CDS 65789 - 66052 | gp104              | 0  | 0  | 0  | 0 | 19 | 16 | 19 | 16 |
| CDS 58252 - 61512 | gp91 Pol III alpha | 0  | 0  | 1  | 0 | 17 | 16 | 18 | 16 |
| CDS 57611 - 57922 | gp89               | 0  | 0  | 1  | 1 | 16 | 15 | 17 | 16 |
| CDS 42937 - 43206 | gp58               | 0  | 0  | 1  | 1 | 15 | 15 | 16 | 16 |
| CDS 49171 - 49716 | gp75               | 0  | 0  | 9  | 9 | 6  | 6  | 15 | 15 |
| CDS 16939 - 17307 | gp27               | 20 | 12 | 0  | 0 | 3  | 2  | 23 | 14 |
| CDS 66376 - 66765 | gp106              | 0  | 0  | 0  | 0 | 15 | 14 | 15 | 14 |
| CDS 4712 - 5242   | gp07 Endo VII      | 0  | 0  | 0  | 0 | 14 | 14 | 14 | 14 |
| CDS 3029 - 4702   | gp06 Terminase     | 2  | 0  | 1  | 1 | 12 | 12 | 15 | 13 |
| CDS 43203 - 43586 | gp59               | 0  | 0  | 4  | 4 | 9  | 9  | 13 | 13 |
| CDS 9978 - 10127  | gp16               | 9  | 7  | 3  | 3 | 2  | 2  | 14 | 12 |
| CDS 38032 - 38349 | gp46               | 0  | 0  | 0  | 0 | 13 | 12 | 13 | 12 |
| CDS 65328 - 65792 | gp103 MazG-like    | 0  | 0  | 0  | 0 | 13 | 12 | 13 | 12 |
| CDS 53329 - 53565 | gp80               | 0  | 0  | 3  | 3 | 9  | 9  | 12 | 12 |
| CDS 11079 - 11519 | gp19 Protease      | 0  | 0  | 0  | 0 | 11 | 11 | 11 | 11 |
| CDS 40152 - 40433 | gp50               | 0  | 0  | 2  | 2 | 9  | 9  | 11 | 11 |
| CDS 45804 - 46085 | gp65               | 0  | 0  | 2  | 2 | 8  | 7  | 10 | 9  |
| CDS 40426 - 40668 | gp51               | 0  | 0  | 0  | 0 | 9  | 9  | 9  | 9  |
| CDS 62743 - 62928 | gp94               | 0  | 0  | 0  | 0 | 9  | 9  | 9  | 9  |
| CDS 38597 - 39469 | gp47               | 0  | 0  | 9  | 9 | 0  | 0  | 9  | 9  |
| CDS 19742 - 20101 | gp33 Tail assembly | 0  | 0  | 1  | 0 | 10 | 8  | 11 | 8  |
| CDS 63651 - 64004 | gp97               | 0  | 0  | 0  | 0 | 8  | 7  | 8  | 7  |
| CDS 7102 - 7299   | gp10               | 1  | 1  | 5  | 4 | 2  | 2  | 8  | 7  |
| CDS 57433 - 57675 | gp88               | 0  | 0  | 0  | 0 | 7  | 7  | 7  | 7  |
| CDS 18140 - 18358 | gp30 Head-tail     | 0  | 0  | 0  | 0 | 6  | 6  | 6  | 6  |
| CDS 11568 - 11738 | unknown            | 0  | 0  | 0  | 2 | 2  | 2  | 2  | 4  |
| CDS 61927 - 62667 | gp93 RuvC          | 0  | 0  | 0  | 0 | 5  | 3  | 5  | 3  |
| CDS 42611 - 42934 | gp57               | 0  | 0  | 3  | 2 | 2  | 1  | 5  | 3  |
| CDS 51746 - 52165 | gp77               | 0  | 0  | 0  | 0 | 4  | 3  | 4  | 3  |
| CDS 41106 - 41441 | gp53               | 0  | 0  | 0  | 0 | 3  | 3  | 3  | 3  |
| CDS 1581 - 1829   | Unknown            | 0  | 0  | 1  | 0 | 7  | 0  | 8  | 0  |
| CDS 62925 - 63299 | gp95               | 0  | 0  | 0  | 0 | 5  | 0  | 5  | 0  |
| CDS 49927 - 50169 | unknown            | 0  | 0  | 0  | 0 | 4  | 0  | 4  | 0  |
| CDS 7055 - 7234   | unknown            | 2  | 0  | 0  | 0 | 1  | 0  | 3  | 0  |
| CDS 54950 - 55153 | gp83               | 0  | 0  | 0  | 0 | 2  | 0  | 2  | 0  |

<sup>1</sup>Table is sorted by total number of peptides assigned by stringent criteria. See text for experimental details and thresholds for relaxed/stringent assignments
