# Supplementary figures and images for: Genomics and Proteomics of Mycobacteriophage Patience, an Accidental Tourist in the Mycobacterium Neighborhood
Source: PubMed Central journal article supplement — mBio. 2014 Dec 2;5(6):e02145-14. doi: 10.1128/mBio.02145-14 (PMC4324244; doi:10.1128/mbio.02145-14), 2014-12-02

A

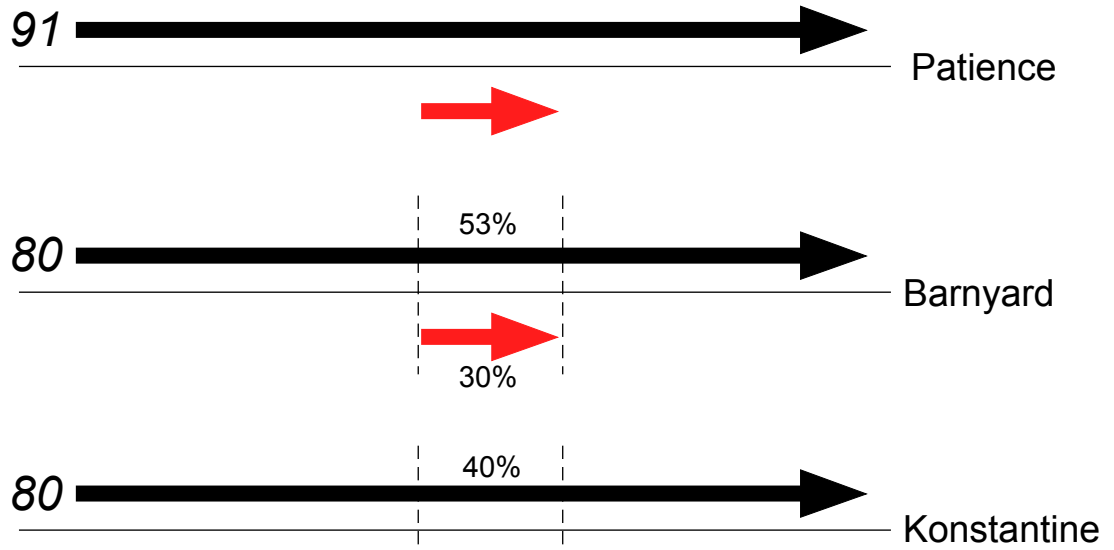

B

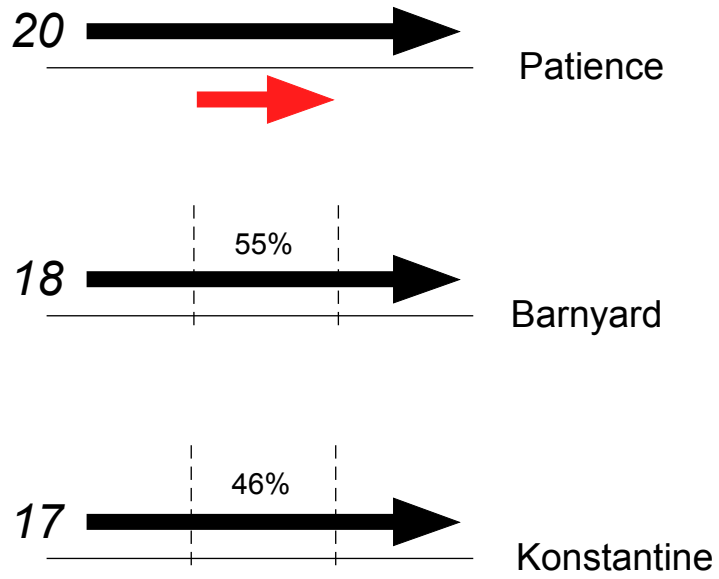

Figure S1

Supplement: mbo006142076sf1.pdf [file mbo006142076sf1.pdf]

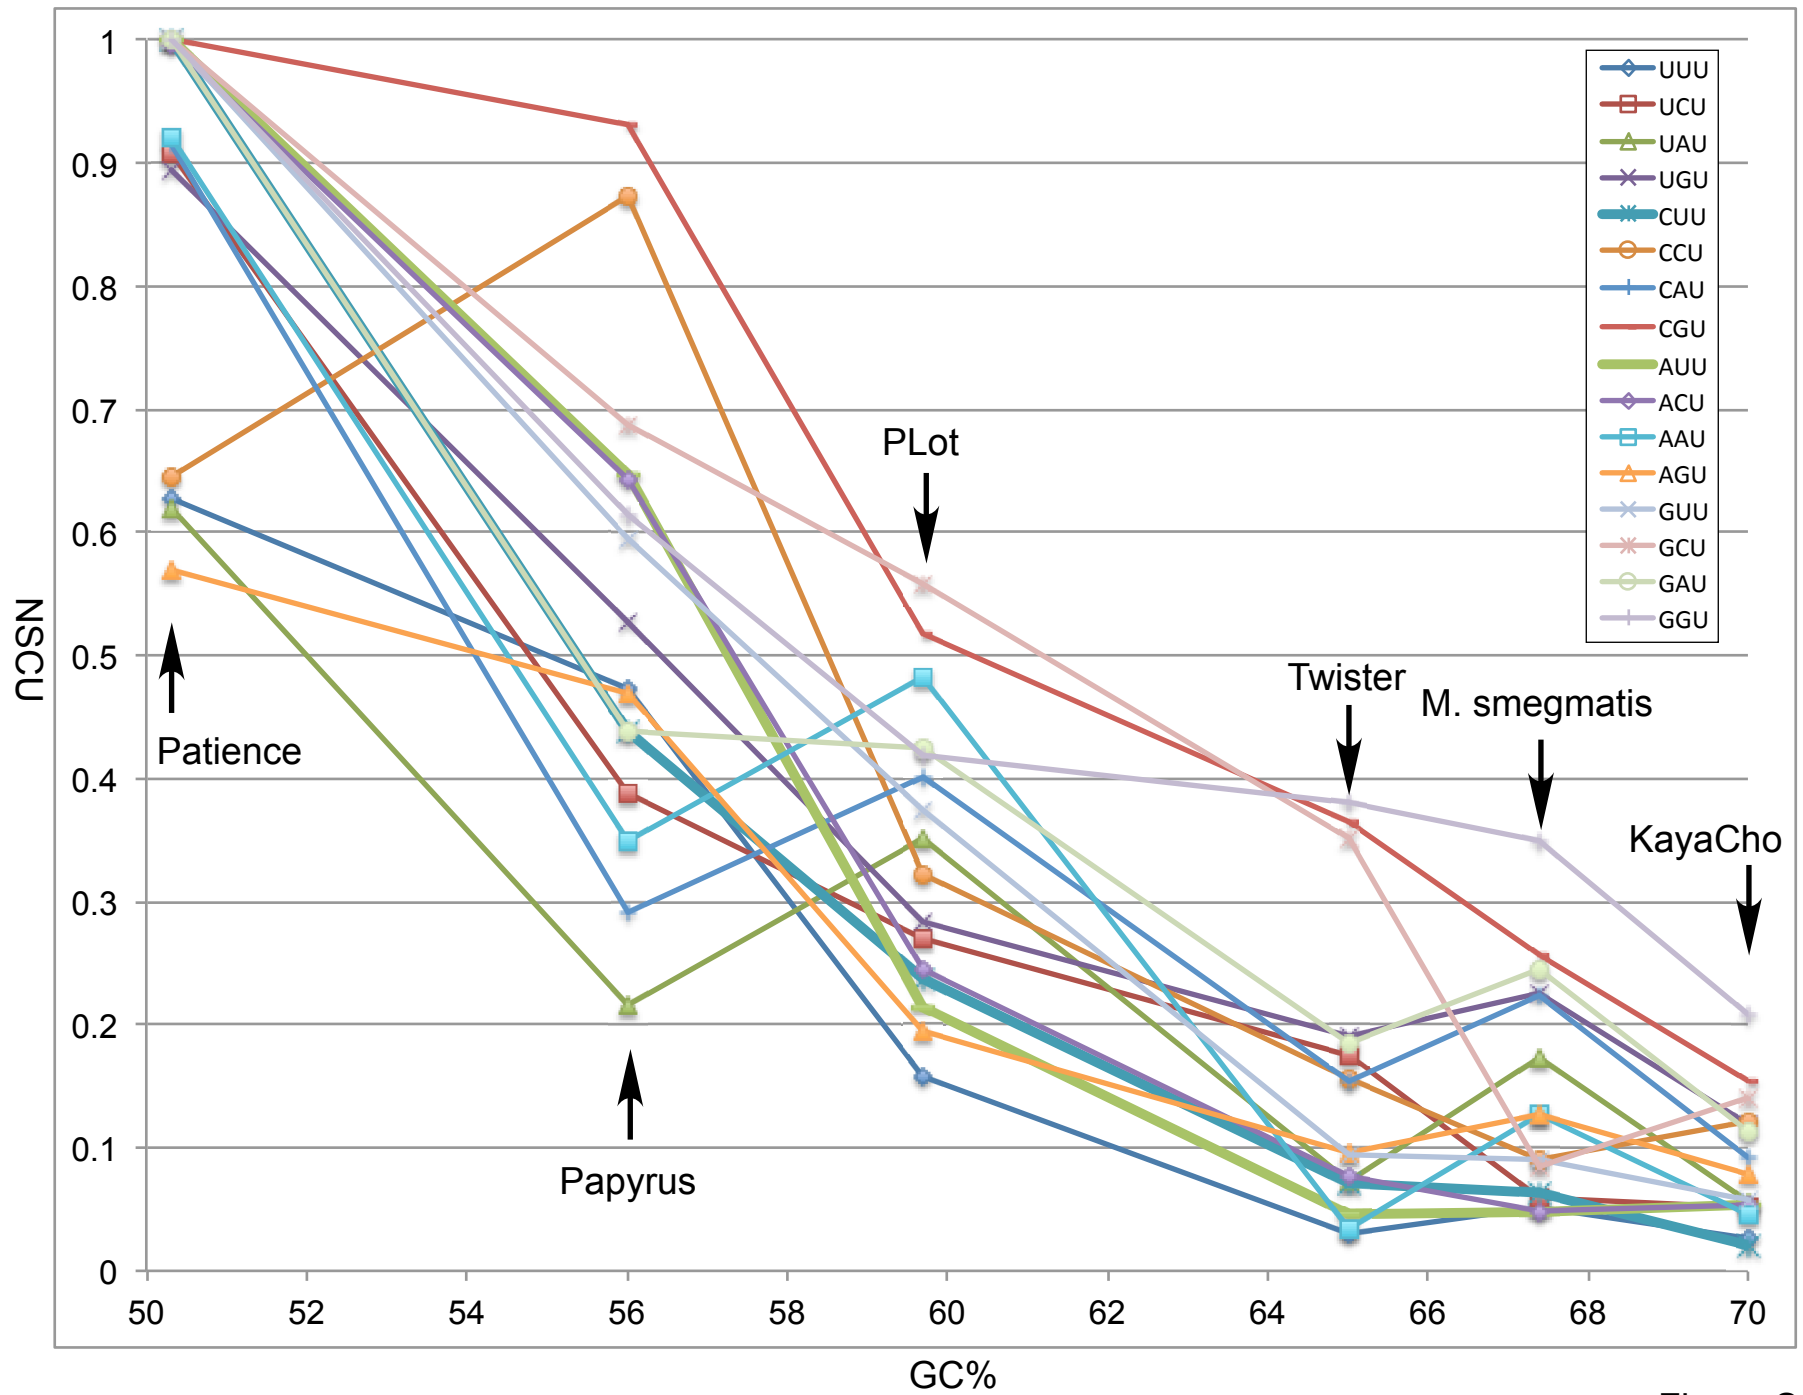

Figure S5

Supplement: mbo006142076sf5.pdf [file mbo006142076sf5.pdf]
